# Supplementary material
Source: publisher site journal article supplement (https://www.spandidos-publications.com/7384/downloadSupplementary)

Figure S1. Grayscale analysis of LC3II/actin ratio and Cleaved PARP expression was presented as the mean  $\pm$  SEM from three independent experiments, indicating significant differences between PD161570 treatment and combined treatment with PD161570 and CQ (\*P<0.05). PARP, poly (ADP-ribose) polymerase; CQ, chloroquine.

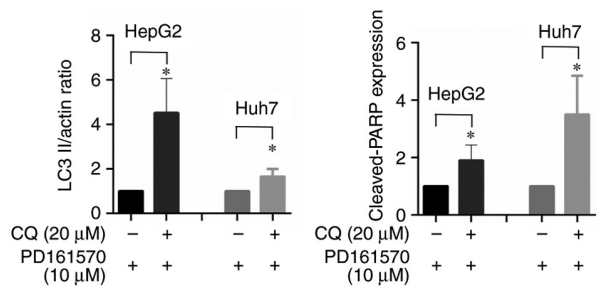

Supplement: Supplementary file 1 [file downloadSupplementary]
